# Supplementary material for: An analytical framework to derive the expected precision of genomic selection
Source: Genet Sel Evol. 2017 Dec 27;49:95. doi: 10.1186/s12711-017-0366-6 (PMC5745666; doi:10.1186/s12711-017-0366-6)
Supplement: Supplementary file 1 — Additional file 1. Diagonal elements of \documentclass[12pt]{minimal} \usepackage{amsmath} \usepackage{wasysym} \usepackage{amsfonts} \usepackage{amssymb} \usepackage{amsbsy} \usepackage{mathrsfs} \usepackage{upgreek} \setlength{\oddsidemargin}{-69pt} \begin{document}$${\text{E}}_{\text{X}} \left[ {{\text{D}}^{ - 1} {\text{ED}}^{ - 1} {\text{E}}} \right]$$\end{document}EXD-1ED-1E. This file provides details about the algebraic derivation of the expectation given in the title. [file 12711_2017_366_MOESM1_ESM.docx]

**Additional file 1: Diagonal elements of**

Elements of the matrix are

In the diagonal

The first term is with expectation

It can simply be shown that, giving

Second term elements are such that, with when , leaving .

Then
