# Supplementary material for: An analytical framework to derive the expected precision of genomic selection
Source: Genet Sel Evol. 2017 Dec 27;49:95. doi: 10.1186/s12711-017-0366-6 (PMC5745666; doi:10.1186/s12711-017-0366-6)
Supplement: Supplementary file 2 — Additional file 2. Algebra when the SNP effect variance \documentclass[12pt]{minimal} \usepackage{amsmath} \usepackage{wasysym} \usepackage{amsfonts} \usepackage{amssymb} \usepackage{amsbsy} \usepackage{mathrsfs} \usepackage{upgreek} \setlength{\oddsidemargin}{-69pt} \begin{document}$$\upsigma_{\upbeta}^{2}$$\end{document}σβ2 is unique. This file shows the derivation in the alternative hypothesis for the SNP effect variance. [file 12711_2017_366_MOESM2_ESM.docx]

**Additional file 2: Algebra when the SNP effect variance is unique.**

Let , with The first order approximation of is The expectation with . Considering a uniform distribution of allele frequencies, we have

As , and ,

The coefficient depends on the variances . With the same uniform hypothesis, its expectation is
